# Supplementary material for: Green Synthesis of Hydrogel-Based Adsorbent Material for the Effective Removal of Diclofenac Sodium from Wastewater
Source: MDPI journal article supplement (doi:10.3390/gels9060454), 2023-06-01
Supplement: s1 [file s1]

# Green Synthesis of Hydrogel-Based Adsorbent Material for the Effective Removal of Diclofenac Sodium from Wastewater

Mariana Chelu <sup>1,\*</sup>, Monica Popa <sup>1,†</sup>, Jose Calderon Moreno <sup>1,\*</sup>, Anca Ruxandra Leonties <sup>1</sup>, Emma Adriana Ozon <sup>2</sup>, Jeanina Pandelescu <sup>1</sup>, Vasile Adrian Surdu <sup>3</sup>, Ludmila Aricov <sup>1</sup> and Adina Magdalena Musuc <sup>1,\*</sup>

<sup>1</sup> "Ilie Murgulescu" Institute of Physical Chemistry, 202 Spl. Independentei, 060021 Bucharest, Romania; pmonica@icf.ro (M.P.); aleonties@icf.ro (A.R.L.); jeanina@icf.ro (J.P.C.); laricov@icf.ro (L.A.)

<sup>2</sup> Department of Pharmaceutical Technology and Biopharmacy, Faculty of Pharmacy, Carol Davila University of Medicine and Pharmacy, 6 Traian Vuia Street, 020945 Bucharest, Romania. emma.budura@umfcd.ro (E.A.O.)

<sup>3</sup> Department of Science and Engineering of Oxide Materials and Nanomaterials, Faculty of Applied Chemistry and Materials Science, University Politehnica of Bucharest, 060042 Bucharest, Romania; adrian.surdu@upb.ro (V.A.S.)

\* Correspondence: mchelu@icf.ro (M.C.); calderon@icf.ro (J.C.M.); amusuc@icf.ro (A.M.M.).

† These authors contributed equally to this work.

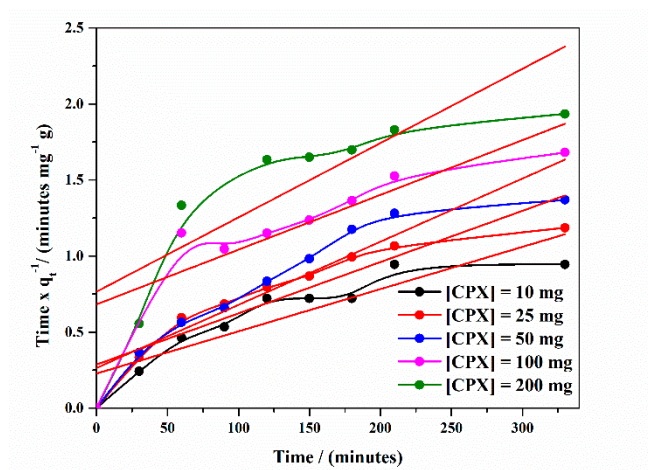

**Figure S1.** The plot of the non-linear form of the pseudo second-order model for different amounts of CPX hydrogel and 0.33 mg DCF

**Table S1.** Pseudo second-order kinetic parameters of DCF adsorption on different amounts of CPX hydrogel.

| [CPX]/(mg) | Intercept | Slope                 | Adj. R <sup>2</sup> |
|------------|-----------|-----------------------|---------------------|
| 10         | 0.23      | $2.78 \times 10^{-3}$ | 0.78                |
| 25         | 0.29      | $3.37 \times 10^{-3}$ | 0.81                |
| 50         | 0.26      | $4.15 \times 10^{-3}$ | 0.86                |
| 100        | 0.77      | $4.88 \times 10^{-3}$ | 0.50                |
| 200        | 0.68      | $3.60 \times 10^{-3}$ | 0.53                |

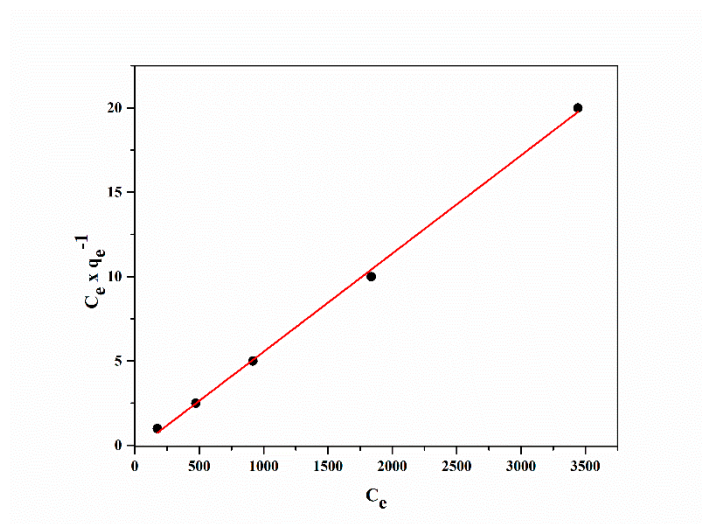

**Figure S2.** Langmuir isotherm representation of DCF adsorption in presence of different CPX amounts.

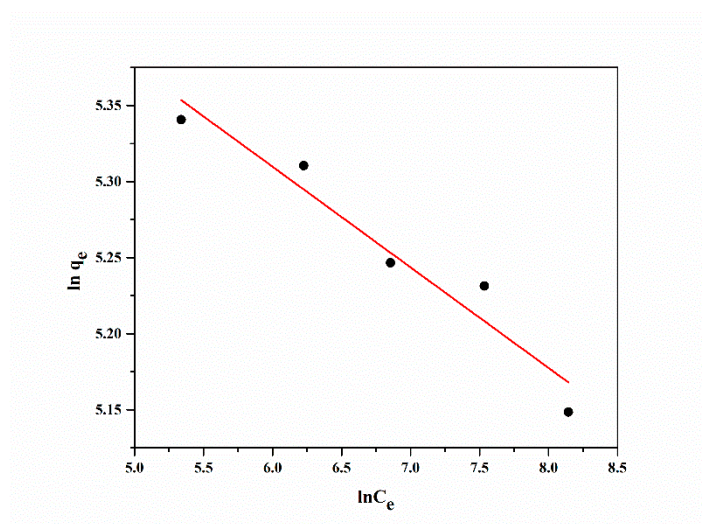

**Figure S3.** Freundlich isotherm representation of DCF adsorption in presence of different CPX amounts.
